# Supplementary material for: COVID-19 and Rates of Cancer Diagnosis in the US
Source: PubMed Central journal article supplement (PMC11380103; doi:10.1001/jamanetworkopen.2024.32288), 2024-09-06
Supplement: jamanetwopen-e2432288-s001.pdf [file jamanetwopen-e2432288-s001.pdf]

## Supplementary Online Content

Burus T, Lei F, Huang B, et al. COVID-19 and rates of cancer diagnosis in the US.  
*JAMA Netw Open.* 2024;7(9):e2432288. doi:10.1001/jamanetworkopen.2024.32288

**eMethods.** Supplemental Description of Methods

**eTable 1.** Potentially Missed Cancer Cases, by Site and Period, 2020-2021, SEER 22 Database, 2001-2021

**eTable 2.** Potentially Missed Screening-Detected Cancer Cases by Stage at Diagnosis and Period, 2020-2021, SEER 22 Database, 2001-2021

**eFigure 1.** Percentage Difference in Observed From Expected All Sites Cancer Incidence Rates, by Population Subgroup and Period, 2020-2021

**eFigure 2.** Percentage Difference in Observed From Expected Incidence Rates, by Urbanicity, Site, and Period, 2020-2021

**eFigure 3.** Percentage Difference in Observed From Expected Incidence Rates, by Age, Site, and Period, 2020-2021

**eFigure 4.** Percentage Difference in Observed From Expected Incidence Rates, by Race and Ethnicity, Site, and Period, 2020-2021

**eFigure 5.** Percentage Difference in Observed From Expected Incidence Rates, by Sex, Site, and Period, 2020-2021

**eFigure 6.** Percentage Difference in Observed From Expected Incidence Rates, by Sex, Age, Site, and Period, 2020-2021

**eFigure 7.** Monthly Age-Adjusted All Cancer Sites Incidence Rates, by Sex and Age, January 2017-December 2021

**eReferences.**

This supplementary material has been provided by the authors to give readers additional information about their work.

## **eMethods. Supplemental Description of Methods**

### **A. Joinpoint regression estimates.**

Joinpoint regression estimates of expected incidence rates for 2020 and 2021 were produced based on Joinpoint regression analysis of annual incidence rate trends from 2000 to 2019.<sup>1</sup> In particular, for every cancer site of interest (with sex, race and ethnicity, age, urbanicity, or stage at diagnosis stratification, as applicable) we first fit a piecewise log-linear regression model to cancer incidence rate trends from 2000 to 2019 using the National Cancer Institute's Joinpoint software version 5.1.0. Prospective models were constrained to at most two breaks (referred to as joinpoints) resulting in no more than three distinct linear segments, each of which was required to contain at least four years of data. Individual linear segments were fit using weighted least squares regression with inverse variance weights. The final piecewise regression model was selected based upon the least weighted Bayesian Information Criteria value and parametric 95% confidence intervals were determined.<sup>2</sup>

Once a best Joinpoint regression model was determined, slope and intercept parameters for the linear model defining the final segment were extracted. This segment was guaranteed to cover observed incidence rates for the years of 2016-2019 at a minimum, and give the best estimate of trends in the years leading up to the start of the COVID-19 pandemic. We used these parameters to reconstruct the weighted linear regression model for the final segment in the R statistical programming language (version 4.3.2; R Foundation) and simulated 10,000 projections for expected incidence rates in 2020 and 2021. We estimated a final expected incidence rate for both years using the mean of the simulated projections and determined a 95% prediction interval (PI) by taking the 2.5<sup>th</sup> and 97.5<sup>th</sup> percentiles of simulated projections.

### **B. ARIMA estimates**

The autoregressive and integrated moving average (ARIMA) estimates of expected incidence rates for 2020 and 2021 were developed according to the method described previously in Burus et al.<sup>3</sup> For this paper, we sought to estimate monthly age-adjusted incidence rates for January 2020-December 2021 in order to align with the annual age-adjusted estimates from the Joinpoint regression method. To accommodate for adding an additional 12 points to the projection, an additional 12 months of data

(January-December 2017) were added to the pre-pandemic trends. We retained the same postulated pulse impact exogenous regressor as used previously for March-May 2020, and extended the postulated step change impact to include the entire 2021 calendar year. Extending the postulated step change impact allows for testing whether monthly incidence rates for June 2020-December 2021 returned to pre-pandemic trends. Additional exogenous regressors were considered to account for successive waves of COVID-19 infection during 2021, but were not incorporated due to a lack of well-defined periods and a desire to avoid overfitting models.

### **C. Ensemble estimates (linear pooling with equal weights)**

We combined Joinpoint regression and ARIMA estimates to construct a final ensemble estimate of expected incidence rates using the method of linear pooling with equal weights.<sup>4,5</sup> Ensemble point estimates for 2020 and 2021 were calculated as the mean of the combined set of 10,000 simulated Joinpoint projections and 10,000 simulated ARIMA projections. Ensemble 95% PI bounds were calculated as the 2.5<sup>th</sup> and 97.5<sup>th</sup> percentiles of the combined Joinpoint and ARIMA simulations.

### **D. Potentially undiagnosed cases sensitivity analysis**

For additional interpretive context, estimates for potentially undiagnosed cancer cases were generated for some of our findings by multiplying the absolute differences between observed and expected incidence rates by the 2000 US Standard Population denominator of 274,633,642 (or 137,316,821 for sex-specific cancer sites). Though this calculation does not account for changes in the underlying age distribution of populations over time, the use of conservative 95% prediction intervals for estimates makes differences negligible. To demonstrate this, we performed a sensitivity analysis comparing our original estimates with estimates generated using our age-stratified findings for the age groups of under age 65 years and age 65 years or older, weighted according to the appropriate proportions of the 2000 US Standard Population (0.874 and 0.126, respectively). The results are presented in the following table. As expected, all adjusted estimates fall within the 95% prediction intervals of the original estimates:

**Sensitivity analysis for estimates of potentially undiagnosed cancer cases by site and period**

| <b>Site</b>             | <b>Period</b> | <b>Original Estimate (95% PI)</b> | <b>Adjusted Estimate</b> |
|-------------------------|---------------|-----------------------------------|--------------------------|
| All Sites               | 2020          | 116350 (103551-131117)            | 112974                   |
|                         | 2021          | 33226 (17513-49463)               | 28817                    |
|                         | Combined      | 149577 (126059-176970)            | 141790                   |
| Female Breast           | 2020          | 14441 (10512-18484)               | 15613                    |
|                         | 2021          | -4432 (-8380 to -114)             | -2961                    |
|                         | Combined      | 10009 (4495-16079)                | 12652                    |
| Lung and Bronchus       | 2020          | 15489 (13016-19643)               | 15255                    |
|                         | 2021          | 12415 (8595-18893)                | 12086                    |
|                         | Combined      | 27904 (22428-37764)               | 27340                    |
| Colon and Rectum        | 2020          | 10654 (8991-12364)                | 10410                    |
|                         | 2021          | 953 (-1157 to 3412)               | 900                      |
|                         | Combined      | 11607 (8432-15517)                | 11310                    |
| Cervix Uteri            | 2020          | 1173 (786-1557)                   | 1143                     |
|                         | 2021          | 485 (37-893)                      | 432                      |
|                         | Combined      | 1658 (934-2279)                   | 1574                     |
| Prostate                | 2020          | 21861 (11602-30095)               | 22794                    |
|                         | 2021          | 6161 (-7433 to 17764)             | 6966                     |
|                         | Combined      | 28022 (6629-46609)                | 29760                    |
| Corpus and Uterus, NOS  | 2020          | 3196 (1887-4158)                  | 3160                     |
|                         | 2021          | 113 (-1689 to 1382)               | 37                       |
|                         | Combined      | 3308 (439-5247)                   | 3196                     |
| Melanoma                | 2020          | 9349 (7037-11613)                 | 9242                     |
|                         | 2021          | 1613 (-1718 to 4281)              | 1623                     |
|                         | Combined      | 10962 (5875-15088)                | 10864                    |
| Urinary Bladder         | 2020          | 3423 (2423-4769)                  | 3351                     |
|                         | 2021          | 1984 (730-3885)                   | 1781                     |
|                         | Combined      | 5407 (3574-8349)                  | 5132                     |
| Non-Hodgkin Lymphoma    | 2020          | 3892 (2889-4926)                  | 3569                     |
|                         | 2021          | 1975 (876-3271)                   | 1488                     |
|                         | Combined      | 5867 (4190-7966)                  | 5056                     |
| Kidney and Renal Pelvis | 2020          | 5151 (3857-6170)                  | 4738                     |
|                         | 2021          | 3173 (1147-4773)                  | 2836                     |
|                         | Combined      | 8324 (5280-10584)                 | 7574                     |
| Pancreas                | 2020          | 1628 (481, 2257)                  | 1554                     |
|                         | 2021          | 1058 (-520 to 1978)               | 975                      |
|                         | Combined      | 2686 (196-4084)                   | 2530                     |

Abbreviations: PI = Prediction Interval; NOS = Not Otherwise Specified

**eTable 1.** Potentially Missed Cancer Cases, by Site and Period, 2020-2021, SEER 22 Database, 2001-2021<sup>6</sup>

|                         | Period   | Observed Rate <sup>a</sup> | Expected Rate (95% PI) | Relative Difference (95% PI) | Potential Missed Cases (95% PI) |
|-------------------------|----------|----------------------------|------------------------|------------------------------|---------------------------------|
| Female Breast           | 2020     | 120.1                      | 130.6 (127.7-133.5)    | -8.1% (-10.1% to -6.0%)      | 14441 (10512-18484)             |
|                         | 2021     | 134.1                      | 130.9 (128.0-134.0)    | 2.5% (0.1%-4.8%)             | -4432 (-8380 to -114)           |
|                         | Combined | 127.1                      | 130.7 (128.7-132.9)    | -2.8% (-4.4% to -1.3%)       | 10009 (4495-16079)              |
| Lung and Bronchus       | 2020     | 44.6                       | 50.2 (49.3-51.7)       | -11.2% (-13.8% to -9.6%)     | 15489 (13016-19643)             |
|                         | 2021     | 45.4                       | 49.9 (48.6-52.3)       | -9.1% (-13.2% to -6.4%)      | 12415 (8595-18893)              |
|                         | Combined | 45.0                       | 50.1 (49.1-51.9)       | -10.1% (-13.3% to -8.3%)     | 27904 (22428-37764)             |
| Colon and Rectum        | 2020     | 33.2                       | 37.1 (36.5-37.7)       | -10.5% (-11.9% to -9.0%)     | 10654 (8991-12364)              |
|                         | 2021     | 36.6                       | 36.9 (36.2-37.8)       | -0.9% (-3.3% to 1.2%)        | 953 (-1157 to 3412)             |
|                         | Combined | 34.9                       | 37.0 (36.4-37.7)       | -5.7% (-7.5% to -4.2%)       | 11607 (8432-15517)              |
| Cervix Uteri            | 2020     | 7.0                        | 7.9 (7.6-8.1)          | -10.9% (-13.9% to -7.6%)     | 1173 (786-1557)                 |
|                         | 2021     | 7.5                        | 7.9 (7.5-8.2)          | -4.5% (-8.0% to -0.4%)       | 485 (37-893)                    |
|                         | Combined | 7.3                        | 7.9 (7.6-8.1)          | -7.7% (-10.3% to -4.5%)      | 1658 (934-2279)                 |
| Prostate                | 2020     | 105.9                      | 121.8 (114.3-127.8)    | -13.1% (-17.2% to -7.4%)     | 21861 (11602-30095)             |
|                         | 2021     | 119.6                      | 124.1 (114.2-132.6)    | -3.6% (-9.8% to 4.7%)        | 6161 (-7433 to 17764)           |
|                         | Combined | 112.7                      | 122.9 (115.2-129.7)    | -8.3% (-13.1% to -2.1%)      | 28022 (6629-46609)              |
| Corpus and Uterus, NOS  | 2020     | 26.4                       | 28.7 (27.8-29.4)       | -8.1% (-10.3% to -4.9%)      | 3196 (1887-4158)                |
|                         | 2021     | 28.8                       | 28.9 (27.6-29.8)       | -0.3% (-3.4% to 4.5%)        | 113 (-1689 to 1382)             |
|                         | Combined | 27.6                       | 28.8 (27.8-29.5)       | -4.2% (-6.5% to -0.6%)       | 3308 (439-5247)                 |
| Melanoma                | 2020     | 18.8                       | 22.2 (21.3-23.0)       | -15.4% (-18.4% to -12.0%)    | 9349 (7037-11613)               |
|                         | 2021     | 21.7                       | 22.3 (21.1-23.2)       | -2.6% (-6.7% to 3.0%)        | 1613 (-1718 to 4281)            |
|                         | Combined | 20.2                       | 22.2 (21.3-23.0)       | -9.0% (-12.0% to -5.0%)      | 10962 (5875-15088)              |
| Urinary Bladder         | 2020     | 17.1                       | 18.4 (18.0-18.9)       | -6.8% (-9.2% to -4.9%)       | 3423 (2423-4769)                |
|                         | 2021     | 17.6                       | 18.3 (17.8-19.0)       | -3.9% (-7.4% to -1.5%)       | 1984 (730-3885)                 |
|                         | Combined | 17.4                       | 18.3 (18.0-18.9)       | -5.4% (-8.1% to -3.6%)       | 5407 (3574-8349)                |
| Non-Hodgkin Lymphoma    | 2020     | 17.5                       | 19.0 (18.6-19.3)       | -7.5% (-9.3% to -5.7%)       | 3892 (2889-4926)                |
|                         | 2021     | 18.2                       | 18.9 (18.5-19.4)       | -3.8% (-6.1% to -1.7%)       | 1975 (876-3271)                 |
|                         | Combined | 17.9                       | 18.9 (18.6-19.3)       | -5.6% (-7.5% to -4.1%)       | 5867 (4190-7966)                |
| Kidney and Renal Pelvis | 2020     | 16.2                       | 18.0 (17.6-18.4)       | -10.4% (-12.2% to -8.0%)     | 5151 (3857-6170)                |
|                         | 2021     | 16.9                       | 18.1 (17.3-18.6)       | -6.4% (-9.3% to -2.4%)       | 3173 (1147-4773)                |
|                         | Combined | 16.5                       | 18.0 (17.5-18.5)       | -8.4% (-10.4% to -5.5%)      | 8324 (5280-10584)               |
| Pancreas                | 2020     | 13.2                       | 13.8 (13.4-14.0)       | -4.3% (-5.9% to -1.3%)       | 1628 (481-2257)                 |
|                         | 2021     | 13.5                       | 13.9 (13.3-14.2)       | -2.8% (-5.1% to 1.4%)        | 1058 (-520 to 1978)             |
|                         | Combined | 13.3                       | 13.8 (13.4-14.1)       | -3.5% (-5.3% to -0.3%)       | 2686 (196-4084)                 |

<sup>a</sup> Rates given per 100,000 people in the population and age-adjusted to the 2000 U.S. Standard Population

Abbreviations: PI = Prediction Interval; NOS = Not Otherwise Specified.

**eTable 2.** Potentially Missed Screening-Detected Cancer Cases by Stage at Diagnosis and Period, 2020-2021, SEER 22 Database, 2001-2021<sup>6</sup>

| Site               | Period   | Observed Rate <sup>a</sup> | Expected Rate (95% PI) | Relative Difference (95% PI) | Potential Missed Cases (95% PI) |
|--------------------|----------|----------------------------|------------------------|------------------------------|---------------------------------|
| <b>Early Stage</b> |          |                            |                        |                              |                                 |
| Female Breast      | 2020     | 77.1                       | 85.4 (83.0 - 87.9)     | -9.7% (-12.3% to -7.1%)      | 11383 (8048 - 14790)            |
|                    | 2021     | 88.3                       | 85.8 (83.0 - 88.7)     | 2.9% (-0.5% to 6.4%)         | -3377 (-7328 to 610)            |
|                    | Combined | 82.7                       | 85.6 (83.5 - 87.8)     | -3.4% (-5.8% to -1.0%)       | 8005 (2185 - 13996)             |
| Lung and Bronchus  | 2020     | 12.2                       | 14.9 (13.9 - 16.4)     | -18.4% (-26.1% to -12.5%)    | 7550 (4779 - 11764)             |
|                    | 2021     | 13.2                       | 15.3 (13.9 - 17.2)     | -13.7% (-23.5% to -5.1%)     | 5765 (1927 - 11120)             |
|                    | Combined | 12.7                       | 15.1 (14.0 - 16.6)     | -16.1% (-23.6% to -9.5%)     | 13315 (7266 - 21513)            |
| Colon and Rectum   | 2020     | 10.8                       | 12.6 (11.5 - 13.3)     | -14.3% (-19.2% to -6.2%)     | 4926 (1940 - 7019)              |
|                    | 2021     | 12.4                       | 12.4 (11.1 - 13.3)     | 0.4% (-6.8% to 11.6%)        | -140 (-3535 to 2468)            |
|                    | Combined | 11.6                       | 12.5 (11.5 - 13.2)     | -7.0% (-12.3% to 1.0%)       | 4786 (-601 to 8963)             |
| Cervix Uteri       | 2020     | 2.8                        | 3.5 (3.2 - 3.8)        | -18.0% (-24.7% to -12.1%)    | 859 (535 - 1277)                |
|                    | 2021     | 3.1                        | 3.5 (3.2 - 3.8)        | -11.5% (-18.6% to -4.9%)     | 551 (220 - 968)                 |
|                    | Combined | 3.0                        | 3.5 (3.3 - 3.7)        | -14.8% (-20.0% to -9.8%)     | 1410 (886 - 2041)               |
| <b>Late Stage</b>  |          |                            |                        |                              |                                 |
| Female Breast      | 2020     | 40.0                       | 42.2 (40.5 - 43.5)     | -5.2% (-8.1% to -1.3%)       | 2988 (751 - 4810)               |
|                    | 2021     | 43.1                       | 42.0 (40.4 - 43.4)     | 2.6% (-0.9% to 6.7%)         | -1477 (-3694 to 529)            |
|                    | Combined | 41.5                       | 42.1 (40.8 - 43.4)     | -1.3% (-4.2% to 1.9%)        | 1511 (-2118 to 5046)            |
| Lung and Bronchus  | 2020     | 29.5                       | 32.2 (30.3 - 34.4)     | -8.5% (-14.4% to -2.9%)      | 7490 (2420 - 13638)             |
|                    | 2021     | 29.7                       | 31.7 (29.2 - 34.9)     | -6.4% (-15.0% to 1.8%)       | 5534 (-1474 to 14396)           |
|                    | Combined | 29.6                       | 31.9 (30.0 - 34.5)     | -7.4% (-14.3% to -1.4%)      | 13024 (2278 - 27009)            |
| Colon and Rectum   | 2020     | 20.1                       | 21.6 (21.0 - 22.2)     | -7.0% (-9.4% to -4.4%)       | 4132 (2569 - 5709)              |
|                    | 2021     | 21.9                       | 21.6 (21.0 - 22.2)     | 1.1% (-1.6% to 4.0%)         | -657 (-2288 to 983)             |
|                    | Combined | 21.0                       | 21.6 (21.2 - 22.1)     | -2.9% (-4.9% to -0.9%)       | 3474 (1009 - 5996)              |
| Cervix Uteri       | 2020     | 3.8                        | 3.9 (3.7 - 4.1)        | -3.5% (-7.9% to 1.2%)        | 188 (-63 to 439)                |
|                    | 2021     | 4.0                        | 3.9 (3.7 - 4.1)        | 3.8% (-1.4% to 9.5%)         | -203 (-480 to 80)               |
|                    | Combined | 3.9                        | 3.9 (3.7 - 4.0)        | 0.1% (-3.7% to 4.3%)         | -15 (-435 to 406)               |

<sup>a</sup> Rates given per 100,000 people in the population and age-adjusted to the 2000 US Standard Population

<sup>b</sup> Early stage at diagnosis defined as localized stage only

<sup>c</sup> Late stage at diagnosis defined as regional and distant stage

Abbreviations: PI = Prediction Interval

**eFigure 1.** Percentage Difference in Observed From Expected All Sites Cancer Incidence Rates, by Population Subgroup and Period, 2020-2021.<sup>6</sup> Error bars indicate the 95% prediction interval (PI). (\*) indicates significantly worse disruption than comparison group based on non-overlapping 95% PIs. NH = Non-Hispanic; API = Asian and Pacific Islander.

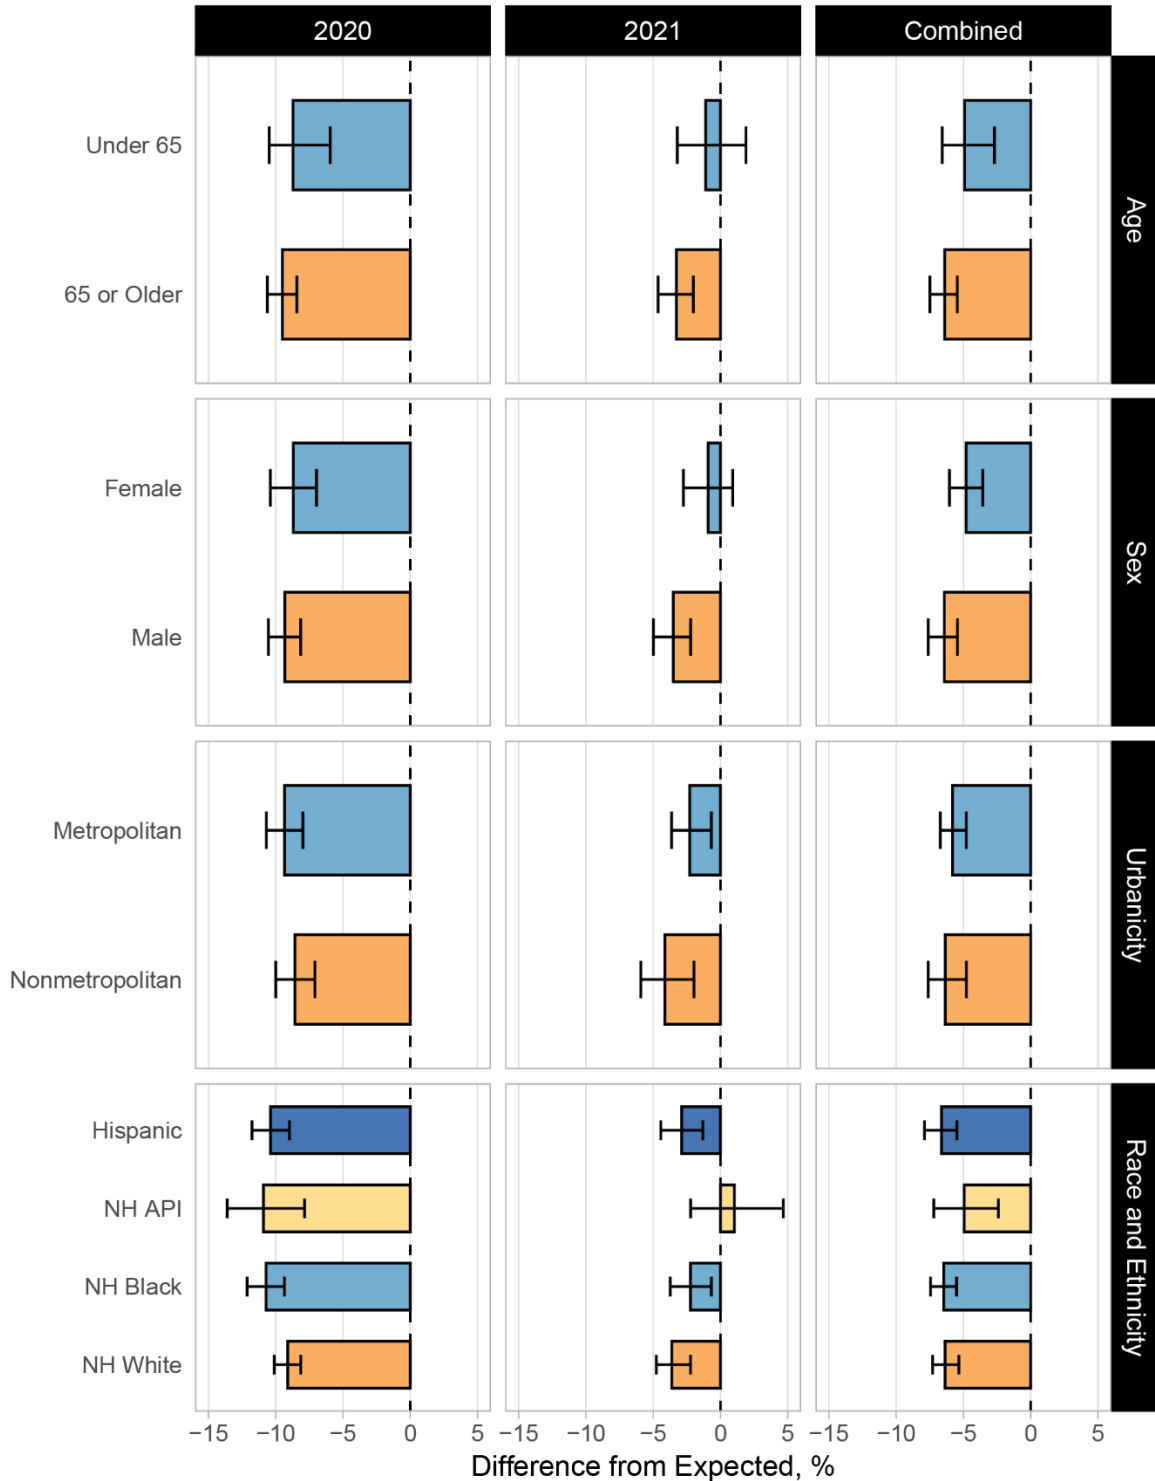

**eFigure 2.** Percentage Difference in Observed From Expected Incidence Rates, by Urbanicity, Site, and Period, 2020-2021.<sup>6</sup> Error bars indicate the 95% prediction interval (PI). (\*) indicates significantly worse disruption than comparison group based on non-overlapping 95% PIs. NOS = Not Otherwise Specified.

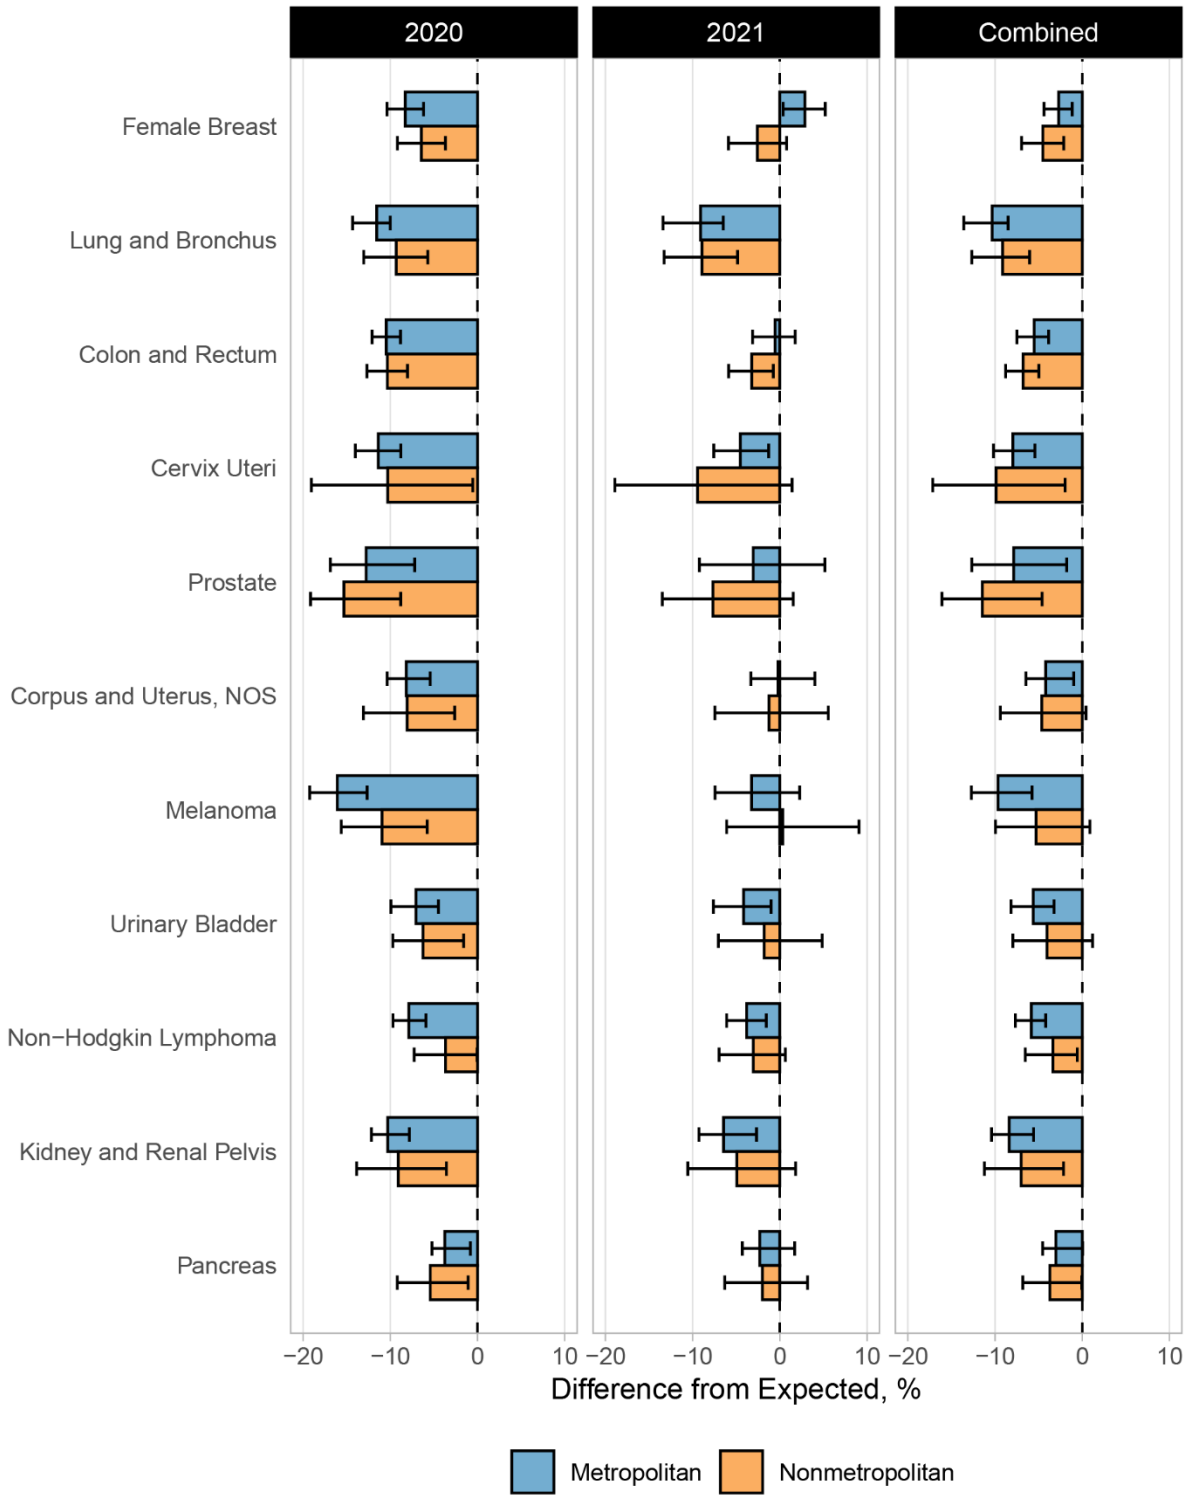



**eFigure 3.** Percentage Difference in Observed From Expected Incidence Rates, by Age, Site, and Period, 2020-2021.<sup>6</sup> Error bars indicate the 95% prediction interval (PI). (\*) indicates significantly worse disruption than comparison group based on non-overlapping 95% PIs. NOS = Not Otherwise Specified.

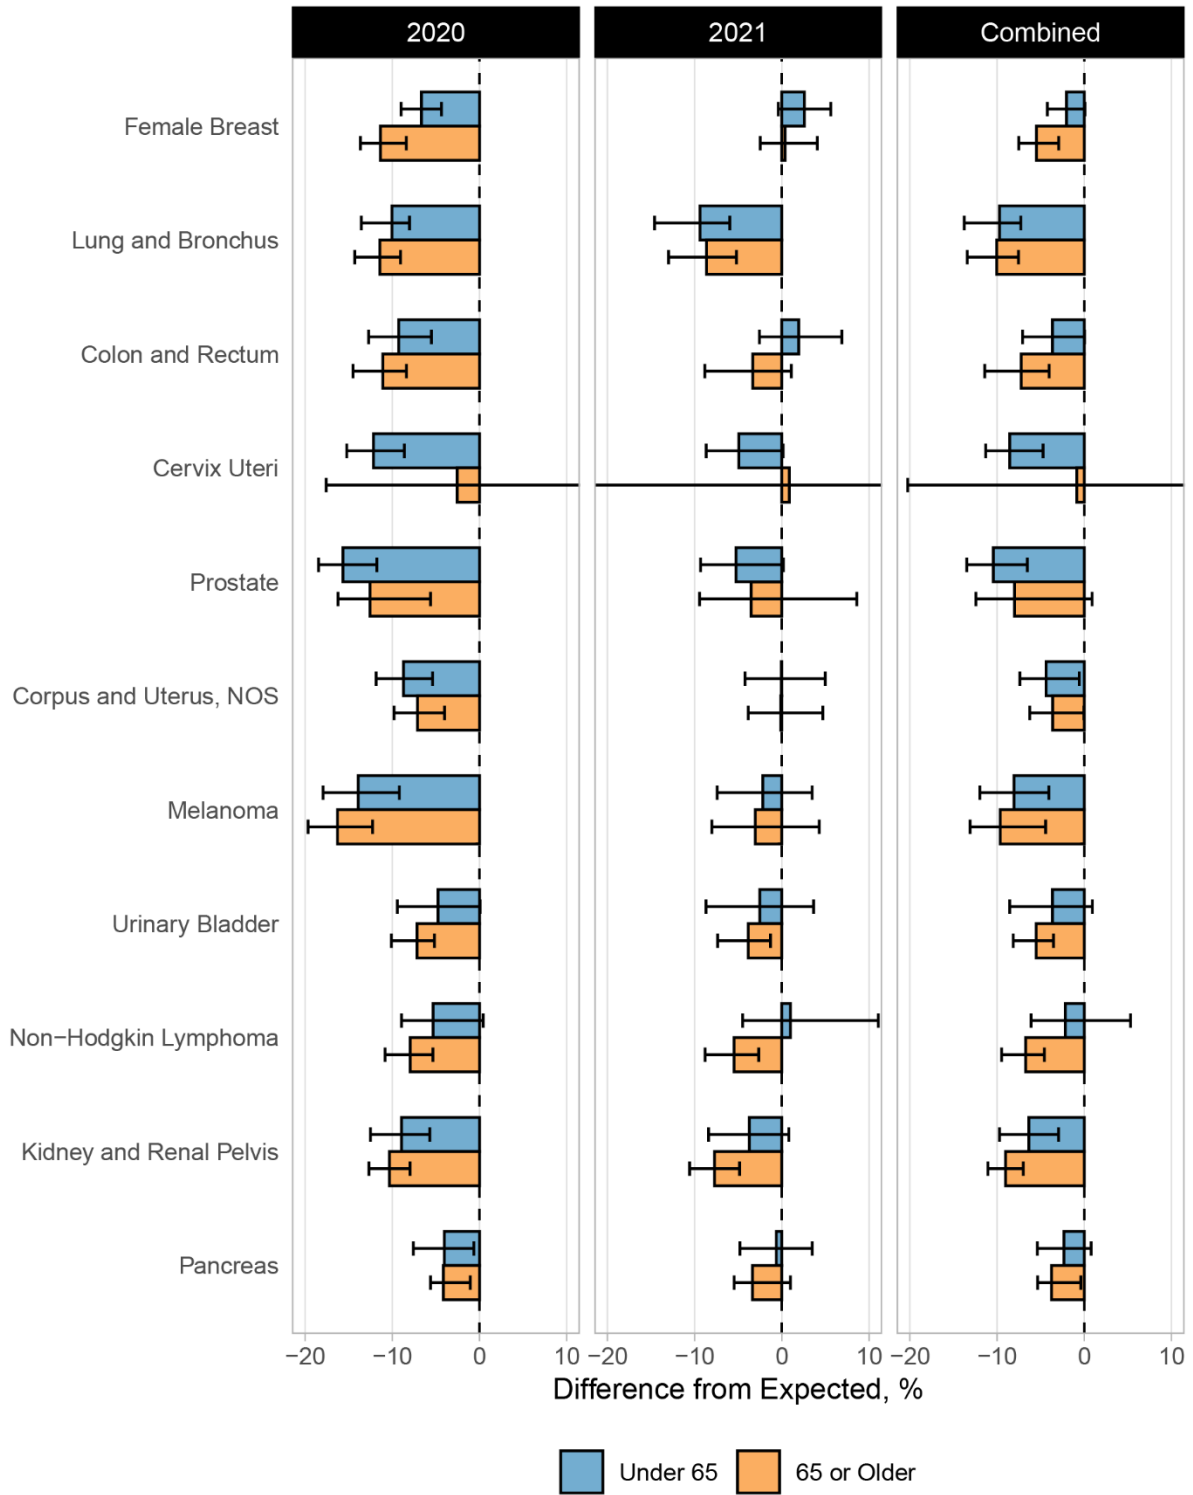

**eFigure 4.** Percentage Difference in Observed From Expected Incidence Rates, by Race and Ethnicity, Site, and Period, 2020-2021.<sup>6</sup> Error bars indicate the 95% prediction interval (PI). (\*) indicates significantly worse disruption than comparison group based on non-overlapping 95% PIs. NOS = Not Otherwise Specified; NH = Non-Hispanic.

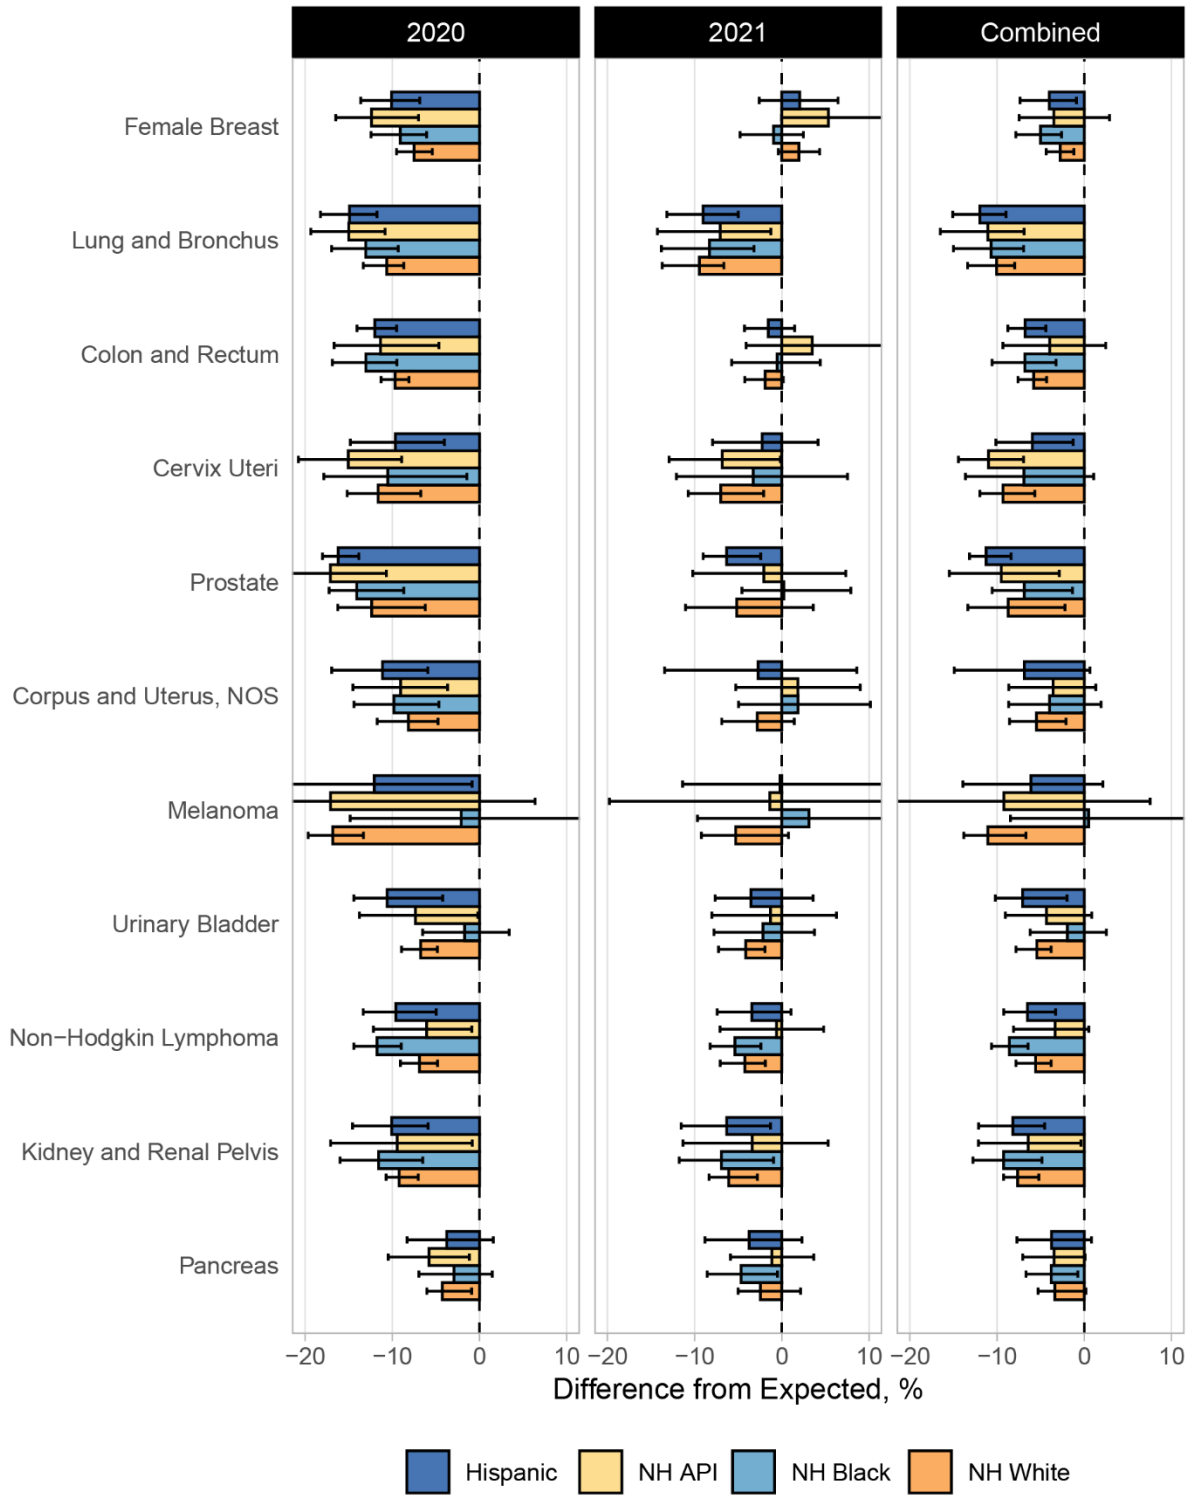

**eFigure 5.** Percentage Difference in Observed From Expected Incidence Rates, by Sex, Site, and Period, 2020-2021.<sup>6</sup> Error bars indicate the 95% prediction interval (PI). (\*) indicates significantly worse disruption than comparison group based on non-overlapping 95% PIs.

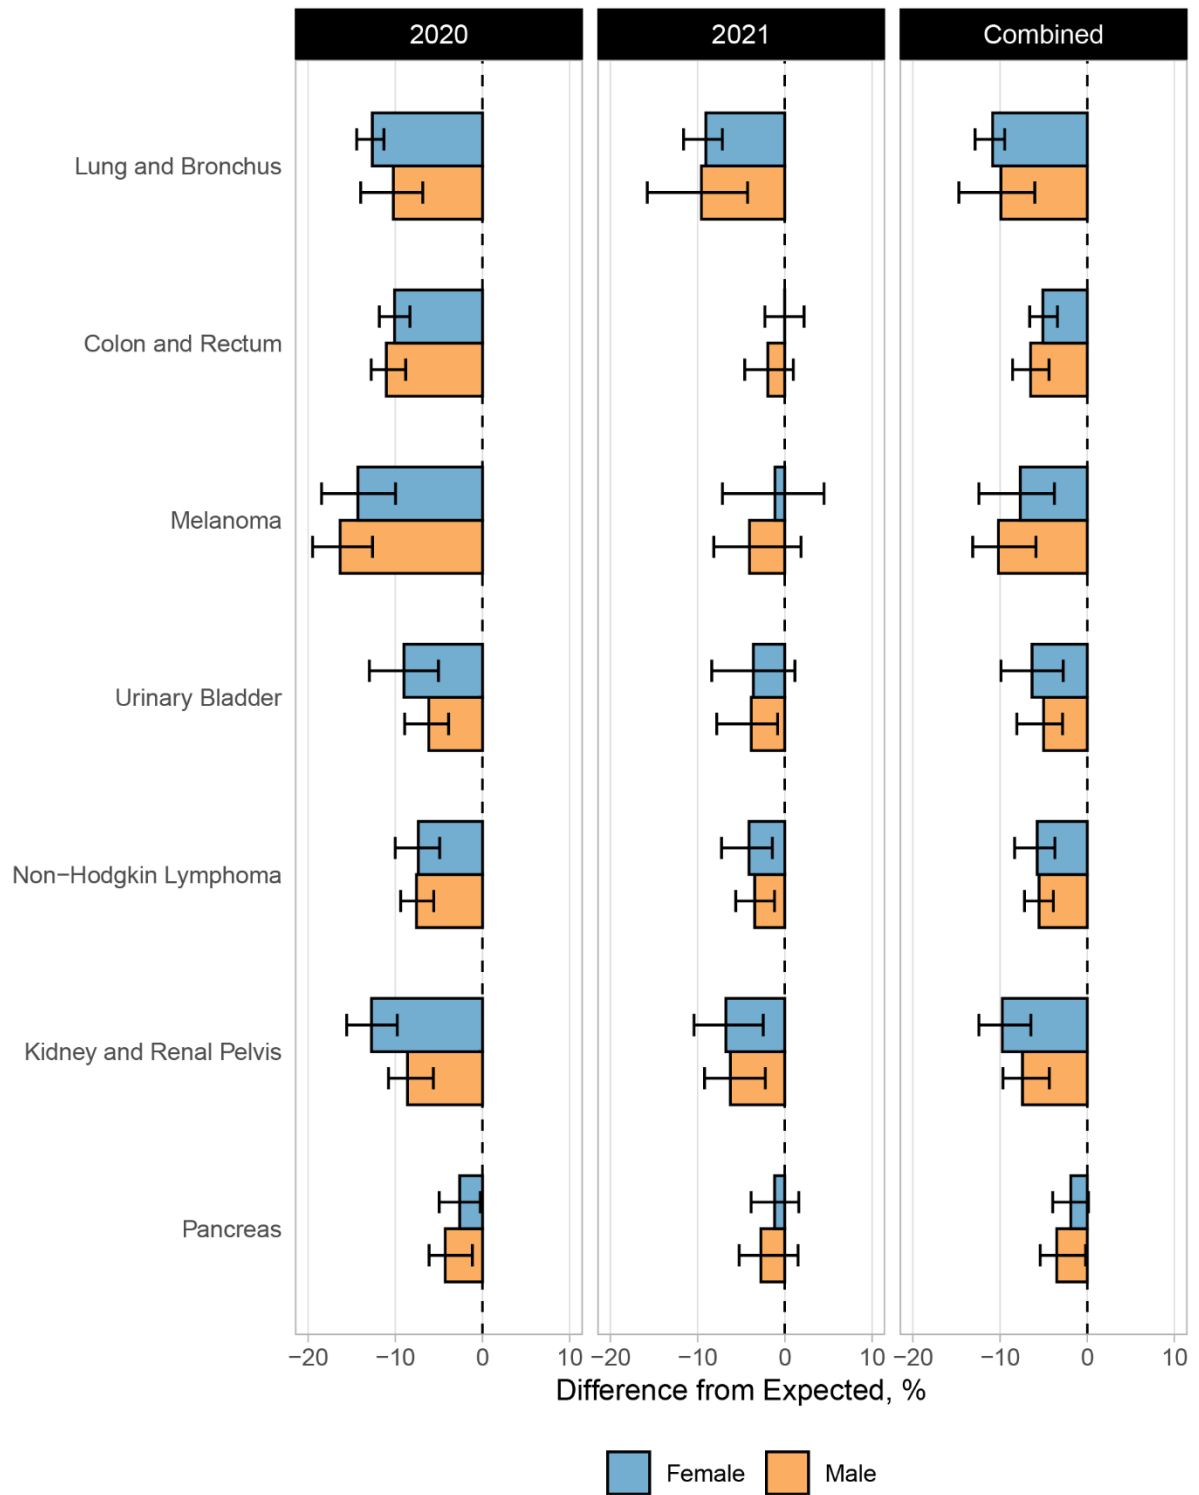

**eFigure 6.** Percentage Difference in Observed From Expected Incidence Rates, by Sex, Age, Site, and Period, 2020-2021.<sup>6</sup> Error bars indicate the 95% prediction interval (PI).

(\*) indicates significantly worse disruption than comparison group based on non-overlapping 95% PIs.

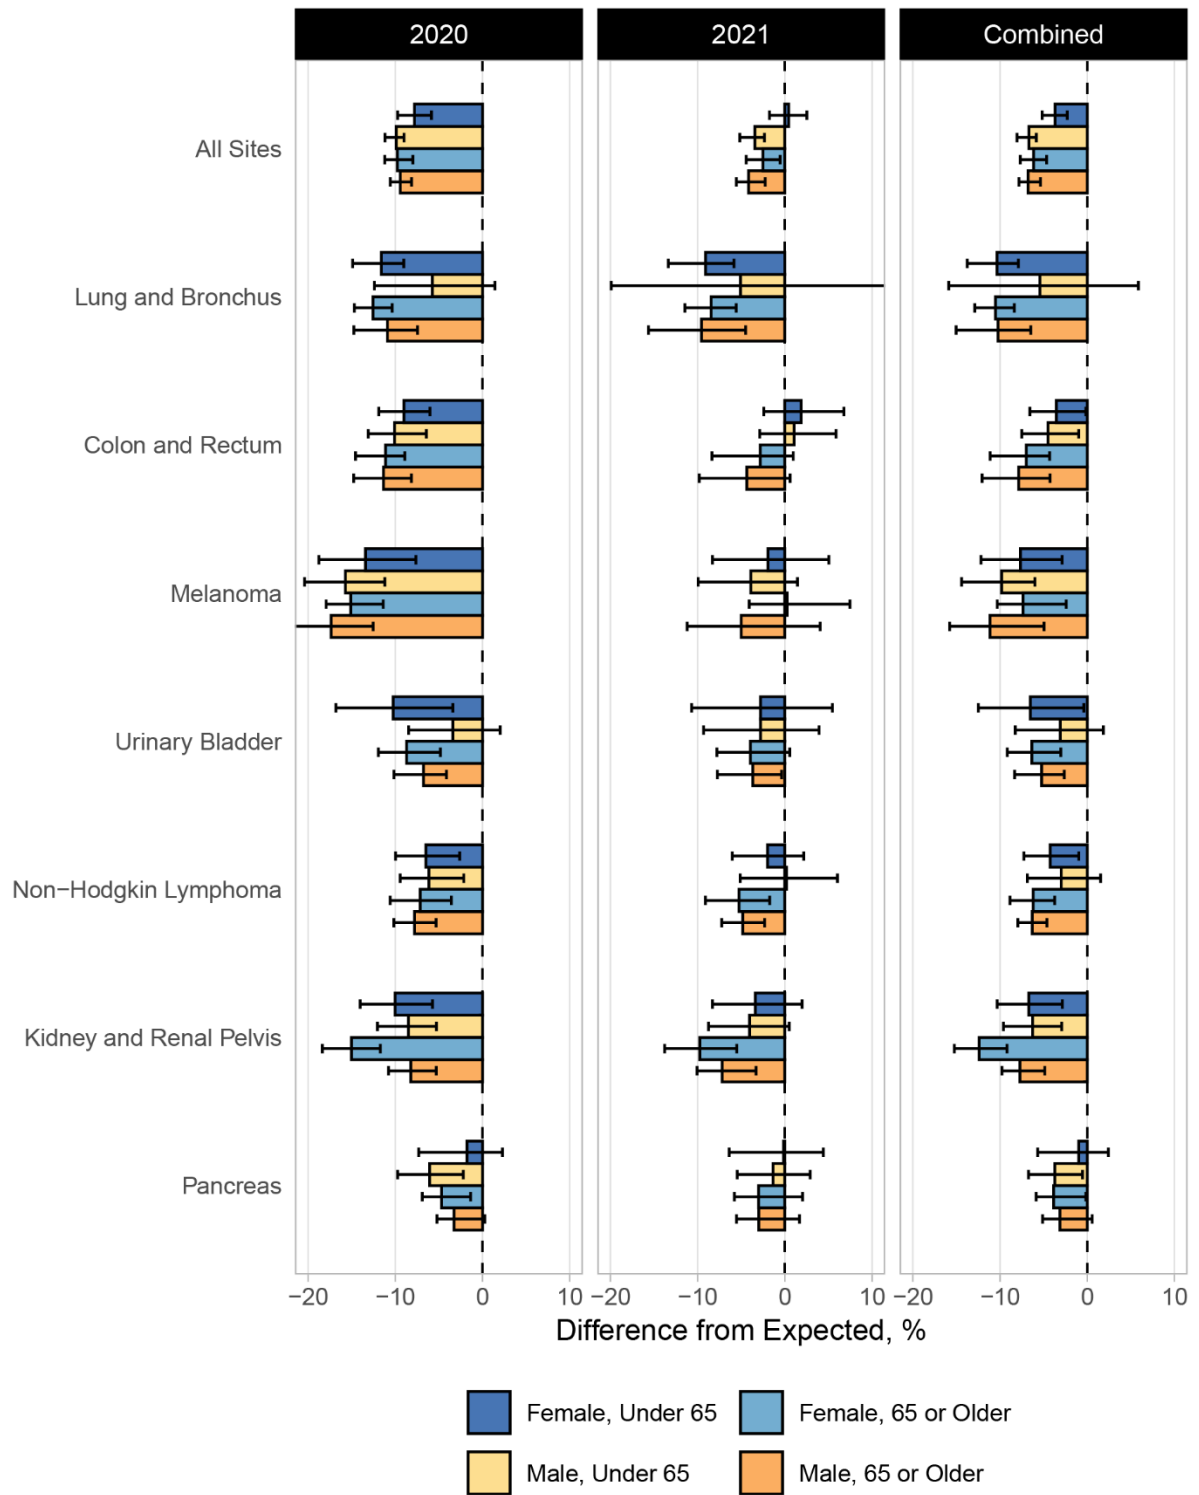

**eFigure 7.** Monthly Age-Adjusted All Cancer Sites Incidence Rates, by Sex and Age, January 2017-December 2021.<sup>6</sup> (A) Female, under age 65 years; (B) male, under age 65 years; (C) female, age 65 years or older; (D) male, age 65 years or older. Grey segment highlights March-April 2021.

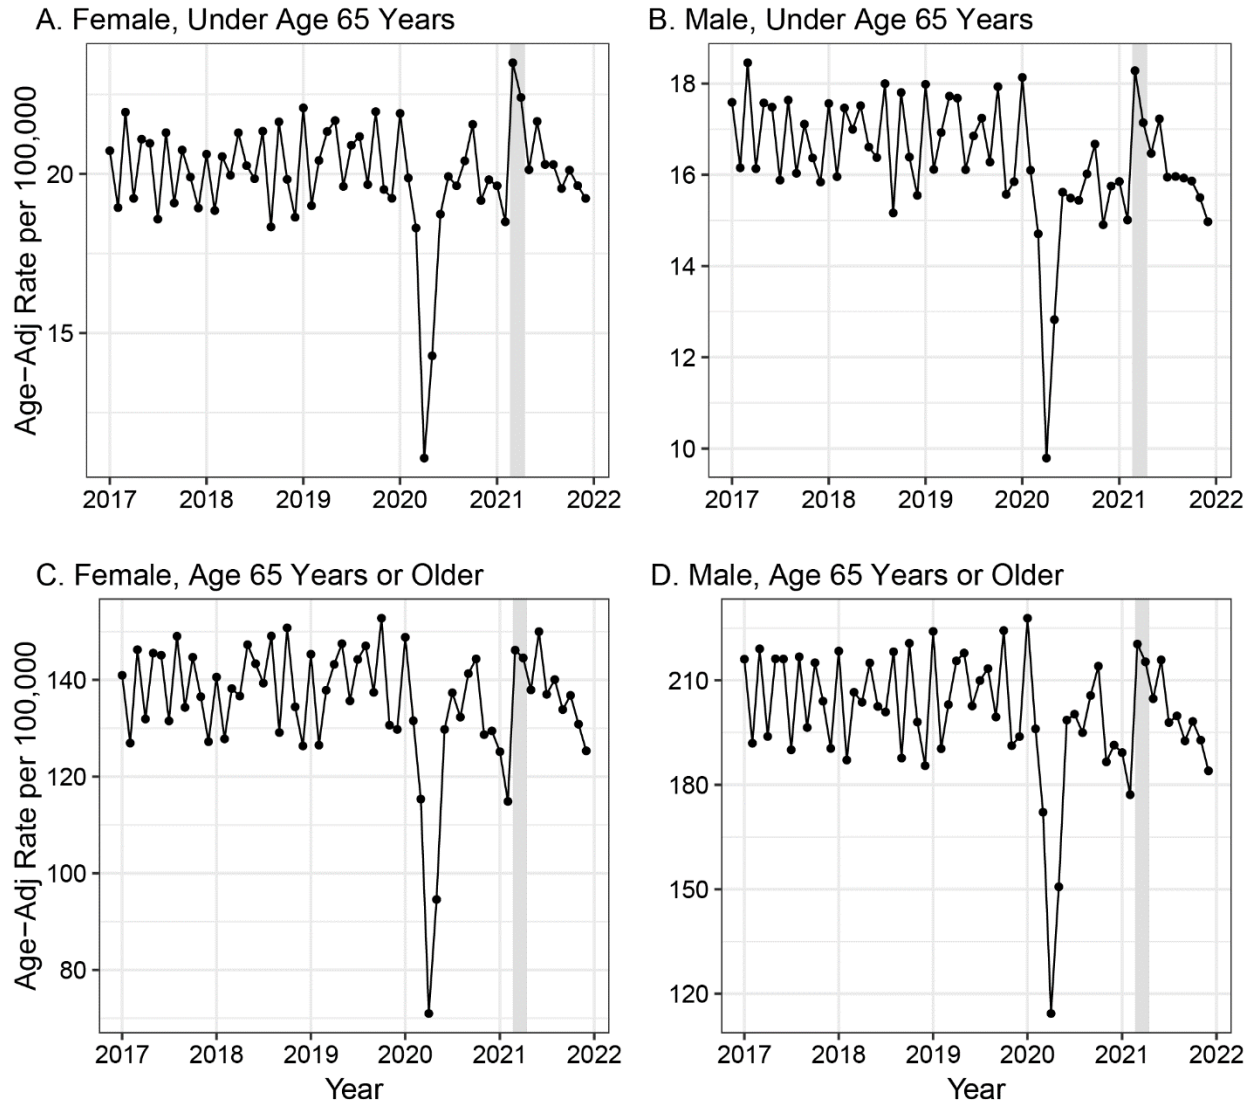

## eReferences.

1. Kim HJ, Fay MP, Feuer EJ, Midthune DN. Permutation tests for joinpoint regression with applications to cancer rates. *Statist Med.* 2000;19(3):335-351. doi:10.1002/(SICI)1097-0258(20000215)19:3<335::AID-SIM336>3.0.CO;2-Z
2. Division of Cancer Control & Population Sciences, National Cancer Institute. Method and Parameters Tab. Accessed April 26, 2024. <https://surveillance.cancer.gov/help/joinpoint/setting-parameters/method-and-parameters-tab>
3. Burus T, Lei F, Huang B, et al. Undiagnosed Cancer Cases in the US During the First 10 Months of the COVID-19 Pandemic. *JAMA Oncol.* Published online February 22, 2024. doi:10.1001/jamaoncol.2023.6969
4. Wallis KF. Combining Density and Interval Forecasts: A Modest Proposal\*. *Oxf Bull Econ Stat.* 2005;67(s1):983-994. doi:10.1111/j.1468-0084.2005.00148.x
5. Wang X, Hyndman RJ, Li F, Kang Y. Forecast combinations: an over 50-year review. *International Journal of Forecasting.* 2023;39(4):1518-1547. doi:10.1016/j.ijforecast.2022.11.005
6. National Cancer Institute, DCCPS, Surveillance Research Program. Surveillance, Epidemiology, and End Results (SEER) Program (www.seer.cancer.gov) SEER\*Stat Database: Incidence - SEER Research Limited-Field Data, 22 Registries, Nov 2023 Sub (2000-2021). Published online April 2024.
