# Supplementary material for: COVID-19 and Rates of Cancer Diagnosis in the US
Source: PubMed Central journal article supplement (PMC11380103; doi:10.1001/jamanetworkopen.2024.32288), 2024-09-06
Supplement: jamanetwopen-e2432288-s002.pdf [file jamanetwopen-e2432288-s002.pdf]

## Data Sharing Statement

Burus. COVID-19 and Rates of Cancer Diagnosis in the US. *JAMA Netw Open*. Published September 06, 2024. doi:10.1001/jamanetworkopen.2024.32288

### Data

**Data available:** No

### Additional Information

**Explanation for why data not available:** The data used for this study is from the National Cancer Institute's Surveillance, Epidemiology, and End Results program. Investigators can access this data through a data use agreement with the National Cancer Institute.
